# Supplementary material
Source: Springer Nature journal article supplement (https://www.springermedizin.de/resource/supplementary/13002_2013_341_MOESM5_ESM.pdf/9627660)

**A**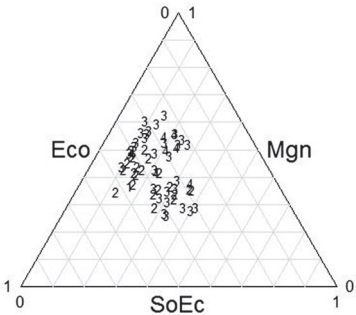**B**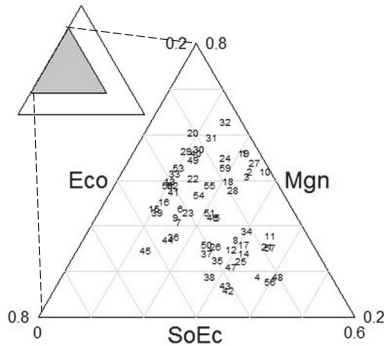

Supplement: MOESM5 [file 9627660]
